# Supplementary material for: The Role of Potent Thiols in “Empyreumatic” Flint/Struck-Match/Mineral Odours in Chardonnay Wine
Source: Hindawi journal article supplement (doi:10.1155/2023/8847476), 2023-07-31
Supplement: f1 [file 8847476.f1.docx]

**SUPPORTING INFORMATION**

**The role of potent thiols in ‘empyreumatic’ flint/struck-match/mineral odours in Chardonnay wine**

Damian Espinase Nandorfy1,2, †, Tracey Siebert1,†, Eleanor Bilogrevic1, Desireé Likos1, Flynn Watson1, Sheridan Barter1, Lisa Pisaniello1, Allie Kulcsar1, Robert A. Shellie2, Russell Keast2, Leigh Francis1, Marlize Bekker1

*1The Australian Wine Research Institute, PO Box 197, Glen Osmond SA 5064, Australia*

*2CASS Food Research Centre, School of Exercise and Nutrition Sciences, Deakin University, 221 Burwood Highway, Burwood Vic 3125, Australia*

*†Damian Espinase Nandorfy and Tracey Siebert contributed equally to this original research article*

*Corresponding Author, Damian Espinase Nandorfy, email damian.espinasenandorfy@awri.com.a*u

**List of Supporting Information**

**Table S1.** Summary of the self-reported demographic data collected from all participating consumers.

**Table S2:** White wine calibration and validation data quantifying for *n*-alkyl γ-lactones using direct-immersion (DI)-SPME-GC-MSMS method, as determined in duplicate in commercially available Chardonnay wine (13.0% alcohol).

**Table S3.** Calibration and validation data for the quantification of benzyl compounds in white wine using HS-SPME-GC/MS in SIM mode.

**Table S4.** Mean sensory scores for the appearance and aroma attributes of the 24 commercial Chardonnay wines.

**Table S5.** Mean sensory scores for the taste, mouthfeel, and flavour attributes of the 24 commercial Chardonnay wines.

**Table S6.** Summary of the aroma compounds quantified in the 24 commercial Chardonnay wines.

**Figure S1.** Factor 1 and 5 of scores and loadings plots from the PLS regression model. Plots were generated using sensory terms (*Y* variables) and compositional compounds (*X* variables) supported by statistical evidence (*P* < 0.05) to have differed among the wines.

**Figure S2.** Factor 1 and 3 of scores and loadings plots from the PLS regression model. Plots were generated using consumer response (*Y* variables) and sensory attributes (*X* variables) supported by statistical evidence (*P* < 0.05) to have differed among the wines.

**Table S1.** Summary of the self-reported demographic data collected from all participating consumers (n = 92).

| **Overview of consumers** | **Consumer Sample (%)** |
| --- | --- |
| **Gender** |  |
| Male | 37.6 |
| Female | 62.4 |
| Prefer not to say | 0 |
| **Age** |  |
| 18-35 | 31.2 |
| 36-50 | 25.8 |
| 51-65 | 43.0 |
| **Education** |  |
| High school diploma | 6.5 |
| TAFE, Cert., diploma, apprenticeship | 15.1 |
| Bachelor degree | 35.5 |
| Postgraduate degree | 43.0 |
| Other | 0.0 |
| **Household income per year ($)** |  |
| Less than 20 000 | 0.0 |
| 20-40 000 | 5.4 |
| 40-60 000 | 15.1 |
| 60-80 000 | 15.1 |
| 80-100 000 | 8.6 |
| 100-150 000 | 21.5 |
| more than 150 000 | 34.4 |
| **How long drinking wine (years)** |  |
| Less than 2 | 1.1 |
| 2-5 | 5.4 |
| 6-10 | 7.5 |
| 11-20 | 28.0 |
| More than 20 | 58.1 |
| **Frequency of white wine consumption (per** **week)** |  |
| Less than once | 4.3 |
| 1-2 | 31.2 |
| 3-4 | 44.1 |
| More than 5 | 20.4 |
| **Consumption of Chardonnay** |  |
| 1-2 times per year | 18.3 |
| 3-4 times per year | 16.1 |
| Once a month | 25.8 |
| Once a fortnight | 17.2 |
| Once a week | 20.4 |
| A few times per week | 2.2 |

**Table S2:** White wine calibration and validation data quantifying for *n*-alkyl γ-lactones using direct-immersion (DI)-SPME-GC-MSMS method, as determined in duplicate in commercially available Chardonnay wine (13.0% alcohol).

| **Compound** | **CAS Number** | **Retention Time (mins)** | **Quantifier MRM (CE, V)** | **Qualifier MRM (CE, V)** | **Gain** | **Linearity** | | **Limits (µg/L)** | | **Low Spike (n = 7)** | | **High Spike (n = 7)** | |
| --- | --- | --- | --- | --- | --- | --- | --- | --- | --- | --- | --- | --- | --- |
| **R2** | **Range (µg/L)** | **Detection** | **Quantitation** | **Recovery (%)** | **Repeatability (RSD %)** | **Recovery (%)** | **Repeatability (RSD%)** |
| *d*7-γ-Octalactone (IS) | 1104979-28-3 | 15.02 | 90.0 → 62.0 (5) | 120.0 → 73.0 (15) | 25 |  |  |  |  |  |  |  |  |
| γ-Octalactone | 104-50-7 | 14.96 | 85.0 → 85.0 (5) | 124.0 → 96.0 (5), 100.0 → 55.1 (15) | 25 | 0.9991 | 0, 0.41 – 100.1 | 0.7 | 1.5 | 102 | 5.2 | 105 | 4.8 |
| *d*7-γ-Nonalactone (IS) | 1104979-30-7 | 18.61 | 90.0 → 62.0 (5) | 107.0 → 61.0 (10), 135.0 → 99.0 (15) | 2 |  |  |  |  |  |  |  |  |
| γ-Nonalactone | 104-61-0 | 18.44 | 128.0 → 95.0 (15) | 85.0 → 57.0 (5), 85.0 → 85.0 (5) | 2 | 0.9999 | 0, 0.11 – 118.7 | 0.2 | 0.4 | 104 | 6.6 | 98 | 1.6 |
| *d*7-γ-Decalactone (IS) | 1104979-33-0 | 22.91 | 90 → 62.0 (5) | 107.0 → 61.0 (15), 135.0 → 99.0 (15) | 2 |  |  |  |  |  |  |  |  |
| 6-Amyl-α-pyrone | 27593-23-3 | 21.24 | 110.0 → 82.0 (15) | 166.0 → 81.0 (15), 95.0 → 95.0 (15) | 4 | 0.9980 | 0, 0.20 – 106.9 | 0.2 | 0.4 | 88 | 4.2 | 91 | 2.8 |
| γ-Decalactone | 706-14-9 | 22.83 | 128.0 → 95.0 (10) | 85.0 → 57.0 (5), 85.0 → 85.0 (5) | 2 | 0.9999 | 0, 0.10 – 114.8 | 0.02 | 0.05 | 99 | 2.8 | 99 | 1.7 |
| γ-Methyl decalactone | 7011-83-8 | 23.55 | 169.0 → 109.0 (5) | 99.0 → 99.0 (5), 184.0 → 141.0 (5) | 2 | 0.9996 | 0, 0.10 – 113.3 | 0.07 | 0.14 | 93 | 0.7 | 94 | 1.3 |
| (*Z*)-7-Decen-5-olide (jasmine lactone) | 25524-95-2 | 23.69 | 150.0 → 79.0 (15) | 168.0 → 108.0 (5) | 2 | 0.9902 | 0, 2.12 – 116.4 | 4.1 | 8.2 | 77 | 13.3 | 71 | 3.3 |
| *d*7-γ-Dodecalactone (IS) | 1104979-35-2 | 31.45 | 90.0 → 90.0 (5) | 90.0 → 62.0 (5), 135.0 → 99.0 (10) | 2 |  |  |  |  |  |  |  |  |
| (*Z*)-6-Dodeceno-γ-lactone (dairy lactone) | 18679-18-0 | 30.02 | 196.0 → 136.0 (5) | 85.0 → 85.0 (5), 96.0 → 81.0 (5) | 50 | 0.9998 | 0, 0.001 – 1.006 | 0.005 | 0.010 | 100 | 2.7 | 102 | 3.1 |
| γ-Dodecalactone | 2305-05-7 | 31.46 | 85.0 → 57.0 (5) | 128.0 → 95.0 (5), 136.0 → 79.0 (15) | 2 | 0.9999 | 0, 0.11 – 118.7 | 0.03 | 0.05 | 197 | 2.5 | 100 | 1.7 |

IS, internal standard for the compounds listed directly below.
Recoveries were determined using samples spiked at low and high concentrations: 1 and 10 µg/L for all lactones except 0.001 and 0.1 µg /L for (Z)-6-dodeceno-γ-lactone.

**Table S3.** Calibration and validation data for the quantification of benzyl compounds in white wine using HS-SPME-GC/MS in SIM mode.

| **Analyte** | **CAS Number** | **Retention Time (min)** | **Internal Standard** | **Ions monitored (*m/z*)** | | **Linearity*** | | **Limits (µg/L)** | | **Low Spike (50 µg/L)** | | **High Spike (500 µg/L)** | |
| --- | --- | --- | --- | --- | --- | --- | --- | --- | --- | --- | --- | --- | --- |
| **Quantifier** | **Qualifiers (%)** | **R2** | **Range (µg/L)** | **Detection** | **Quantitation** | **Recovery (%)** | **Repeatability (RSD %)** | **Recovery (%)** | **Repeatability (RSD %)** |
| Benzaldehyde | 100-52-7 | 15.54 | *d*6-Benzaldehyde | 106  112 | 105 (96), 77 (82)  110 (105), 82 (79) | 0.9998 | 0, 2.08−2080 | 0.44 | 1.47 | 95.0 | 0.9 | 93.5 | 0.5 |
| Benzyl alcohol | 100-51-6 | 17.42 | *d*5-Benzyl alcohol | 108  113 | 107 (69), 79 (105)  84 (59), 96 (25) | 0.9998 | 0, 2.17−2170 | 0.62 | 2.08 | 94.8 | 1.5 | 94.8 | 0.6 |
| Benzyl acetate | 140-11-4 | 20.04 | *d*5-Benzyl acetate | 150  155 | 108 (270), 91 (165)  113 (280), 96 (179) | 0.9998 | 0, 2.43−1216 | 0.14 | 0.47 | 100.3 | 1.0 | 96.7 | 0.4 |

*Determined in duplicate in commercially available Chardonnay wine diluted 1:1 with model wine (pH 3.2, 13.0% alcohol).

**Table S4.** Mean sensory scores for the appearance and aroma attributes of the 24 commercial Chardonnay wines.

| **Wine** | **Yellow colour** | **Pungency** | **Flint** | **Peach** | **Passion/**  **grapefruit** | **Pineapple** | **Citrus** | **Natural gas** | **Woody/**  **Vanilla** | **Toasty** | **Apple/**  **Pear** | **Tinned**  **Veg** | **Cheesy** | **Floral** |
| --- | --- | --- | --- | --- | --- | --- | --- | --- | --- | --- | --- | --- | --- | --- |
| AH 1 | 3.2 | 3.4 | 4.4 | 2.1 | 2.2 | 1.7 | 2.7 | 0.9 | 1.7 | 1.4 | 2.0 | 1.4 | 0.9 | 1.2 |
| AH 2 | 3.6 | 3.1 | 1.8 | 2.8 | 1.7 | 1.9 | 2.6 | 0.4 | 1.3 | 1.2 | 2.7 | 1.1 | 2.4 | 1.5 |
| AH 3 | 3.3 | 3.3 | 2.9 | 2.7 | 1.6 | 1.9 | 2.7 | 0.5 | 1.8 | 1.3 | 2.6 | 1.0 | 0.5 | 1.4 |
| AH 4 | 3.8 | 3.1 | 1.3 | 3.7 | 2.8 | 3.1 | 2.7 | 0.1 | 1.0 | 1.1 | 2.7 | 0.6 | 0.9 | 2.4 |
| AH 5 | 2.7 | 3.0 | 1.0 | 3.3 | 2.0 | 2.4 | 3.1 | 0.3 | 0.7 | 1.1 | 3.3 | 0.7 | 1.2 | 1.9 |
| AH 6 | 3.3 | 3.2 | 2.4 | 3.1 | 2.7 | 2.8 | 2.6 | 0.5 | 1.2 | 1.3 | 2.2 | 1.3 | 0.3 | 1.6 |
| AH 7 | 3.1 | 3.1 | 1.0 | 3.2 | 1.8 | 2.0 | 2.4 | 0.1 | 1.2 | 1.5 | 2.8 | 0.6 | 1.1 | 2.4 |
| AH 8 | 3.0 | 3.0 | 1.9 | 2.9 | 2.2 | 2.5 | 3.0 | 0.1 | 0.9 | 1.0 | 2.4 | 0.5 | 0.6 | 2.1 |
| AH 9 | 3.8 | 3.1 | 1.0 | 3.4 | 1.5 | 2.9 | 3.1 | 0.2 | 0.7 | 1.1 | 3.1 | 0.4 | 0.2 | 2.8 |
| HV | 3.3 | 3.2 | 3.2 | 3.0 | 1.7 | 2.2 | 2.8 | 0.3 | 1.8 | 1.4 | 2.5 | 1.0 | 0.3 | 1.7 |
| KR | 3.4 | 2.8 | 1.1 | 3.4 | 1.7 | 2.5 | 2.7 | 0.1 | 1.0 | 1.4 | 2.7 | 0.7 | 1.5 | 1.9 |
| MBH 1 | 4.4 | 3.3 | 5.1 | 2.2 | 1.6 | 1.3 | 2.5 | 0.7 | 2.0 | 1.1 | 1.7 | 1.2 | 0.8 | 0.5 |
| MBH 2 | 4.8 | 3.4 | 5.0 | 2.1 | 1.6 | 1.5 | 2.5 | 1.4 | 2.6 | 1.1 | 1.8 | 1.7 | 0.8 | 0.8 |
| MBH 3 | 4.1 | 3.5 | 5.9 | 1.7 | 1.7 | 1.2 | 2.4 | 1.1 | 2.1 | 1.4 | 1.6 | 1.6 | 0.7 | 0.7 |
| MP | 3.3 | 3.2 | 2.4 | 2.9 | 1.5 | 2.1 | 2.7 | 0.5 | 1.7 | 1.4 | 2.1 | 1.2 | 0.6 | 1.6 |
| MR 1 | 3.3 | 3.5 | 3.3 | 2.9 | 2.4 | 1.8 | 2.9 | 0.5 | 1.8 | 1.2 | 2.2 | 0.9 | 0.3 | 1.2 |
| MR 2 | 3.5 | 2.9 | 0.7 | 3.9 | 3.0 | 3.5 | 3.0 | 0.2 | 0.7 | 0.9 | 3.1 | 0.6 | 0.1 | 3.4 |
| MRS | 3.6 | 3.2 | 1.9 | 3.0 | 1.5 | 2.1 | 2.7 | 0.2 | 2.4 | 1.7 | 2.5 | 0.8 | 0.8 | 2.0 |
| MV | 2.9 | 2.8 | 0.8 | 4.3 | 3.1 | 3.5 | 2.8 | 0.1 | 0.8 | 0.7 | 3.4 | 0.5 | 0.3 | 3.4 |
| TAS | 3.2 | 3.3 | 3.6 | 2.7 | 1.6 | 1.5 | 2.6 | 0.4 | 2.7 | 1.3 | 2.1 | 0.9 | 0.4 | 1.4 |
| TBA 1 | 3.9 | 3.2 | 2.0 | 2.6 | 1.5 | 2.0 | 2.7 | 0.5 | 1.2 | 1.3 | 2.3 | 0.8 | 1.7 | 2.1 |
| TBA 2 | 3.5 | 2.8 | 0.7 | 2.7 | 1.5 | 2.3 | 2.6 | 0.3 | 1.4 | 1.5 | 2.3 | 1.0 | 1.3 | 1.8 |
| YV 1 | 3.3 | 3.0 | 1.1 | 3.5 | 2.0 | 3.3 | 2.7 | 0.2 | 1.2 | 1.1 | 2.9 | 0.7 | 1.0 | 1.5 |
| YV 2 | 3.5 | 3.3 | 2.1 | 2.9 | 1.9 | 2.2 | 2.8 | 0.5 | 1.4 | 1.3 | 2.4 | 1.0 | 0.8 | 1.3 |

**Table S5.** Mean sensory scores for the taste, mouthfeel, and flavour attributes of the 24 commercial Chardonnay wines.

| **Wine** | **Sourness** | **Bitterness** | **Viscosity** | **Hotness** | **Sweetness** | **Astringency** | **Citrus** | **Stone fruit** | **Tropical** | **Mineral/**  **flint** | **Apple/**  **pear** | **Toasty** | **Woody/**  **vanilla** |
| --- | --- | --- | --- | --- | --- | --- | --- | --- | --- | --- | --- | --- | --- |
| AH 1 | 3.2 | 3.4 | 4.4 | 2.1 | 2.2 | 1.7 | 2.7 | 0.9 | 1.7 | 1.4 | 2.0 | 1.4 | 0.9 |
| AH 2 | 3.6 | 3.1 | 1.8 | 2.8 | 1.7 | 1.9 | 2.6 | 0.4 | 1.3 | 1.2 | 2.7 | 1.1 | 2.4 |
| AH 3 | 3.3 | 3.3 | 2.9 | 2.7 | 1.6 | 1.9 | 2.7 | 0.5 | 1.8 | 1.3 | 2.6 | 1.0 | 0.5 |
| AH 4 | 3.8 | 3.1 | 1.3 | 3.7 | 2.8 | 3.1 | 2.7 | 0.1 | 1.0 | 1.1 | 2.7 | 0.6 | 0.9 |
| AH 5 | 2.7 | 3.0 | 1.0 | 3.3 | 2.0 | 2.4 | 3.1 | 0.3 | 0.7 | 1.1 | 3.3 | 0.7 | 1.2 |
| AH 6 | 3.3 | 3.2 | 2.4 | 3.1 | 2.7 | 2.8 | 2.6 | 0.5 | 1.2 | 1.3 | 2.2 | 1.3 | 0.3 |
| AH 7 | 3.1 | 3.1 | 1.0 | 3.2 | 1.8 | 2.0 | 2.4 | 0.1 | 1.2 | 1.5 | 2.8 | 0.6 | 1.1 |
| AH 8 | 3.0 | 3.0 | 1.9 | 2.9 | 2.2 | 2.5 | 3.0 | 0.1 | 0.9 | 1.0 | 2.4 | 0.5 | 0.6 |
| AH 9 | 3.8 | 3.1 | 1.0 | 3.4 | 1.5 | 2.9 | 3.1 | 0.2 | 0.7 | 1.1 | 3.1 | 0.4 | 0.2 |
| HV | 3.3 | 3.2 | 3.2 | 3.0 | 1.7 | 2.2 | 2.8 | 0.3 | 1.8 | 1.4 | 2.5 | 1.0 | 0.3 |
| KR | 3.4 | 2.8 | 1.1 | 3.4 | 1.7 | 2.5 | 2.7 | 0.1 | 1.0 | 1.4 | 2.7 | 0.7 | 1.5 |
| MBH 1 | 4.4 | 3.3 | 5.1 | 2.2 | 1.6 | 1.3 | 2.5 | 0.7 | 2.0 | 1.1 | 1.7 | 1.2 | 0.8 |
| MBH 2 | 4.8 | 3.4 | 5.0 | 2.1 | 1.6 | 1.5 | 2.5 | 1.4 | 2.6 | 1.1 | 1.8 | 1.7 | 0.8 |
| MBH 3 | 4.1 | 3.5 | 5.9 | 1.7 | 1.7 | 1.2 | 2.4 | 1.1 | 2.1 | 1.4 | 1.6 | 1.6 | 0.7 |
| MP | 3.3 | 3.2 | 2.4 | 2.9 | 1.5 | 2.1 | 2.7 | 0.5 | 1.7 | 1.4 | 2.1 | 1.2 | 0.6 |
| MR 1 | 3.3 | 3.5 | 3.3 | 2.9 | 2.4 | 1.8 | 2.9 | 0.5 | 1.8 | 1.2 | 2.2 | 0.9 | 0.3 |
| MR 2 | 3.5 | 2.9 | 0.7 | 3.9 | 3.0 | 3.5 | 3.0 | 0.2 | 0.7 | 0.9 | 3.1 | 0.6 | 0.1 |
| MRS | 3.6 | 3.2 | 1.9 | 3.0 | 1.5 | 2.1 | 2.7 | 0.2 | 2.4 | 1.7 | 2.5 | 0.8 | 0.8 |
| MV | 2.9 | 2.8 | 0.8 | 4.3 | 3.1 | 3.5 | 2.8 | 0.1 | 0.8 | 0.7 | 3.4 | 0.5 | 0.3 |
| TAS | 3.2 | 3.3 | 3.6 | 2.7 | 1.6 | 1.5 | 2.6 | 0.4 | 2.7 | 1.3 | 2.1 | 0.9 | 0.4 |
| TBA 1 | 3.9 | 3.2 | 2.0 | 2.6 | 1.5 | 2.0 | 2.7 | 0.5 | 1.2 | 1.3 | 2.3 | 0.8 | 1.7 |
| TBA 2 | 3.5 | 2.8 | 0.7 | 2.7 | 1.5 | 2.3 | 2.6 | 0.3 | 1.4 | 1.5 | 2.3 | 1.0 | 1.3 |
| YV 1 | 3.3 | 3.0 | 1.1 | 3.5 | 2.0 | 3.3 | 2.7 | 0.2 | 1.2 | 1.1 | 2.9 | 0.7 | 1.0 |
| YV 2 | 3.5 | 3.3 | 2.1 | 2.9 | 1.9 | 2.2 | 2.8 | 0.5 | 1.4 | 1.3 | 2.4 | 1.0 | 0.8 |

**Table S6.** Summary of the aroma compounds quantified in the 24 commercial Chardonnay wines.

| **Compound** | **CAS registry number** | **Code** | **Aroma detection threshold‡** | **Concentration (µg/L)** | | | **N detected** |
| --- | --- | --- | --- | --- | --- | --- | --- |
| **Mean** | **Min** | **Max** |
| *Fermentation-derived* |  |  |  |  |  |  |  |
| Ethyl acetate | 141-78-6 | EtOAc | 7500a | 67196 | 38160 | 123489 | 24 |
| Ethyl propanoate | 105-37-3 | EtPr | 1840b | 198 | 116 | 778 | 24 |
| Ethyl 2-methylpropanoate | 97-62-1 | Et2MePr | 15a | 155 | 47 | 447 | 24 |
| Ethyl butanoate | 105-54-4 | EtBu | 20a | 285 | 175 | 522 | 24 |
| Ethyl 2-methylbutanoate | 7452-79-1 | Et2MeBu | 1a | 17 | 3 | 56 | 24 |
| Ethyl 3-methylbutanoate | 108-64-5 | Et3MeBu | 3a | 31 | 7 | 115 | 24 |
| Ethyl hexanoate | 123-66-0 | EtHex | 14c | 917 | 604 | 1401 | 24 |
| Ethyl octanoate | 106-32-1 | EtOct | 5c | 1235 | 933 | 1636 | 24 |
| Ethyl decanoate | 110-38-3 | EtDec | 200c | 610 | 375 | 1241 | 24 |
| 2-Methylpropyl acetate | 110-19-0 | 2MePrOAc | 1600e | 27 | 4 | 62 | 24 |
| 2-Methylbutyl acetate | 624-41-9 | 2MeBuOAc | 160b | 30 | 5 | 130 | 24 |
| 3-Methylbutyl acetate | 123-92-2 | 3MeBuOAc | 30a | 372 | 62 | 2158 | 24 |
| Hexyl acetate | 142-92-7 | HexOAc | 670b | 28 | 0.5 | 307 | 24 |
| 2-Phenylethyl acetate | 103-45-7 | 2PhEtOAc | 250a | 57 | 7 | 331 | 24 |
| 2-Methylpropanol | 78-83-1 | 2MePrOH | 40000a | 34598 | 10750 | 60293 | 24 |
| Butanol | 71-36-3 | BuOH | 150000a | 1021 | 451 | 1783 | 24 |
| 2-Methylbutanol | 137-32-6 | 2MeBuOH | 65000e | 31084 | 16976 | 44924 | 24 |
| 3-Methylbutanol | 123-51-3 | 3MeBuOH | 40000c | 146373 | 109256 | 207689 | 24 |
| Hexanol | 111-27-3 | HexOH | 8000c | 1529 | 762 | 2616 | 24 |
| 2-Phenylethanol | 60-12-8 | 2PhEtOH | 14000c | 25051 | 12137 | 51642 | 24 |
| Acetic acid | 64-19-7 | AcAc | 200000a | 343334 | 124912 | 555648 | 24 |
| Propanoic acid | 79-09-4 | PrAc | 20000f | 1854 | 780 | 7106 | 24 |
| 2-Methylpropanoic acid | 79-31-2 | 2MePrAc | 2300g | 757 | nd | 1583 | 22 |
| Butanoic acid | 107-92-6 | BuAc | 173g | 1053 | 645 | 2031 | 24 |
| 2-Methylbutanoic acid | 116-53-0 | 2MeBuAc | na | 214 | 104 | 425 | 24 |
| 3-Methylbutanoic acid | 503-74-2 | 3MeBuAc | 33g | 300 | 154 | 792 | 24 |
| Hexanoic acid | 142-62-1 | HexAc | 420g | 5056 | 3107 | 8500 | 24 |
| Octanoic acid | 124-07-2 | OctAc | 500g | 7041 | 4682 | 10712 | 24 |
| Decanoic acid | 334-48-5 | DecAc | 1000g | 2423 | 1029 | 3595 | 24 |
| *Monoterpenes* |  |  |  |  |  |  |  |
| Geraniol | 106-24-1 | Geran | 30a | 2.5 | 1.5 | 4.1 | 24 |
| Linalool | 78-70-6 | Linal | 25g | 1.4 | nd | 5.3 | 13 |
| *cis*-Rose oxide | 876-17-5 | cisROx | 0.2a | 0.02 | nd | 0.10 | 22 |
| *trans*-Rose oxide | 876-18-6 | ni | 14h | 0.02 | nd | 0.07 | 9 |
| α-Terpineol | 98-55-5 | aTerp | 250c | 6.5 | 3.5 | 12.1 | 24 |
| β-Citronellol | 106-22-9 | bCitron | 700c | 8.5 | 1.0 | 25.6 | 24 |
| 1,8-Cineole | 470-82-6 | Cineole | 3.2i | 0.4 | nd | 2.42 | 22 |
| Limonene | 138-86-3 | ni | 10j | 0.1 | nd | 3.1 | 1 |
| Terpinolene | 586-62-9 | ni | na | < 0.1 | nd | 0.3 | 6 |
| *Norisoprenoids* |  |  |  |  |  |  |  |
| β-Damascenone | 23726-93-4 | bDam | 0.05a | 0.36 | nd | 0.94 | 21 |
| 1,1,6-Trimethyl-1,2-dihydronaphthalene | 30364-38-6 | TDN | 2k | 1.2 | 0.15 | 3.43 | 24 |
| Vitispiranes | 65416-59-3 | cisVitis | 101L | 8.82 | 1.82 | 43.01 | 24 |
| **Table S6.** Continued | | | | | | | |
| **Compound** | **CAS registry number** | **Code** | **Aroma detection threshold‡** | **Concentration (µg/L)** | | | **N detected** |
| **Mean** | **Min** | **Max** |
| *Lactones* |  |  |  |  |  |  |  |
| γ-Octalactone | 104-50-7 | gOcta | 700m | 0.7 | nd | 1.8 | 23 |
| γ-Nonalactone | 104-61-0 | gNona | 76m | 1.8 | 0.8 | 3.4 | 24 |
| γ-Decalactone | 706-14-9 | gDeca | 10n | 0.3 | 0.2 | 0.6 | 24 |
| γ-Dodecalactone | 2305-05-7 | gDodeca | 29m | 0.1 | 0.03 | 0.2 | 24 |
| (*Z*)-6-Dodeceno-γ-lactone | 18679-18-0 | gDodeceno | 0.10a | 0.025 | nd | 0.109 | 18 |
| *Sulfur volatiles* |  |  |  |  |  |  |  |
| Hydrogen sulfide | 7783-06-4 | H2S | 1.6o | 4 | 2 | 6 | 24 |
| Methanethiol | 74-93-1 | MeSH | 3.1p | 7 | 3 | 12 | 24 |
| Ethanethiol | 75-08-1 | EtSH | 1.6q | 1 | nd | 7 | 13 |
| Carbon disulfide | 75-15-0 | CS2 | 38r | 4 | 1 | 37 | 24 |
| Dimethyl sulfide | 75-18-3 | DMS | 10a | 23 | 10 | 60 | 24 |
| Diethyl disulfide | 110-81-6 | DEDS | 4.3q | < 0.1 | nd | 0.6 | 1 |
| Methyl thioacetate | 1534-08-3 | MeSAc | 50s | 7 | nd | 28 | 19 |
| Ethyl thioacetate | 625-60-5 | EtSAc | 10s | 3 | nd | 25 | 13 |
| 3-Sulfanylhexanol | 51755-83-0 | 3SH | 0.060t | 0.717 | 0.122 | 3.078 | 24 |
| 3-Sulfanylhexyl acetate | 136954-20-6 | 3SHA | 0.004u | 0.004 | nd | 0.020 | 23 |
| 4-Methyl-4-sulfanylpentan-2-one | 19872-52-7 | 4MSP | 0.0006a | 0.0039 | 0.0007 | 0.0121 | 24 |
| Phenylmethanethiol | 100-53-8 | PMT | 0.0003v | 0.0028 | nd | 0.0124 | 17 |
| 2-Furylmethanethiol | 98-02-2 | 2FMT | 0.0004w | 0.0160 | 0.0003 | 0.1040 | 24 |
| *Oak volatiles* |  |  |  |  |  |  |  |
| Guaiacol | 90-05-1 | Guaiac | 30c | 4 | nd | 11 | 21 |
| 4-Methylguaiacol | 93-51-6 | 4MeG | 30x | 3 | nd | 9 | 21 |
| *cis*-Oak lactone | 55013-32-6 | cisOak | 20y | 104 | nd | 266 | 22 |
| *trans*-Oak lactone | 39638-67-0 | trOak | 140y | 65 | nd | 149 | 22 |
| Furfural | 98-01-1 | Furf | 14100g | 927 | 99 | 2909 | 24 |
| 5-Methylfurfural | 620-02-0 | 5MeFurf | 16000x | 133 | nd | 414 | 22 |
| Vanillin | 121-33-5 | Vanil | 65x | 140 | nd | 305 | 23 |
| 4-Ethylguaiacol | 2785-89-9 | 4EG | 33g | 4 | nd | 84 | 1 |
| 4-Ethylphenol | 123-07-9 | 4EP | 440x | 4 | nd | 107 | 1 |
| Eugenol | 97-53-0 | Eug | 6g | 13 | nd | 28 | 17 |
| *Benzoic volatiles* |  |  |  |  |  |  |  |
| Benzaldehyde | 100-52-7 | BzAl | 3000z | 3 | nd | 15 | 16 |
| Benzyl alcohol | 100-51-6 | BzOH | 200000aa | 0.2 | 0.1 | 0.4 | 24 |
| Benzyl acetate | 140-11-4 | BzOAc | 66bb | 87 | 16 | 229 | 24 |

**‡**Aroma detection threshold, expressed as µg/L, in aqueous ethanol except for: references j, bb - in water; references e, s - in beer; references b, o, p, q, r, y, z - in white wine: a, Guth (1997); b, Etiévant (1991); c, Ferreira, et al. (1998); d, Tao, et al. (2008); e, Meilgaard (1975); f, Salo (1970); g, Ferreira, et al. (2000); h, Takamine et al. (2011); i, Herve et al. (2003); j, Lasekane et al. (2013); k, Sacks, et al. (2012); L, Ziegler et al. (2019); m, Jarauta, et al. (2006); n, Moyano, et al. (2010); o, Siebert, et al. (2009); p, Solomon, et al. (2010); q, Goniak and Noble (1987); r, Spedding and Raut (1982); s, Hughes and Baxter (2001); t, Tominaga, et al. (1998); u, Tominaga, et al. (1996); v, Tominaga et al. (2003); w, Tominaga, et al. (2000); x, Boidron, et al. (1998); y, Brown, et al. (2006); z, Simpson (1978); aa, Gómez-Míguez et al. (2007); bb, Buttery et al. (1982).

Min, minimum concentration; Max, maximum concentration; na, data not available; nd, not detected; ni, data not included in PLS-R; N, number of wines that the compound was detected and quantified in. Compounds not quantified in any sample because they were not detected or were below the limit of detection: nerol, β-ionone, diethyl sulfide, dimethyl disulfide, 6-amyl-α-pyrone, γ-methyl decalactone, and (*Z*)-7-decen-5-olide.


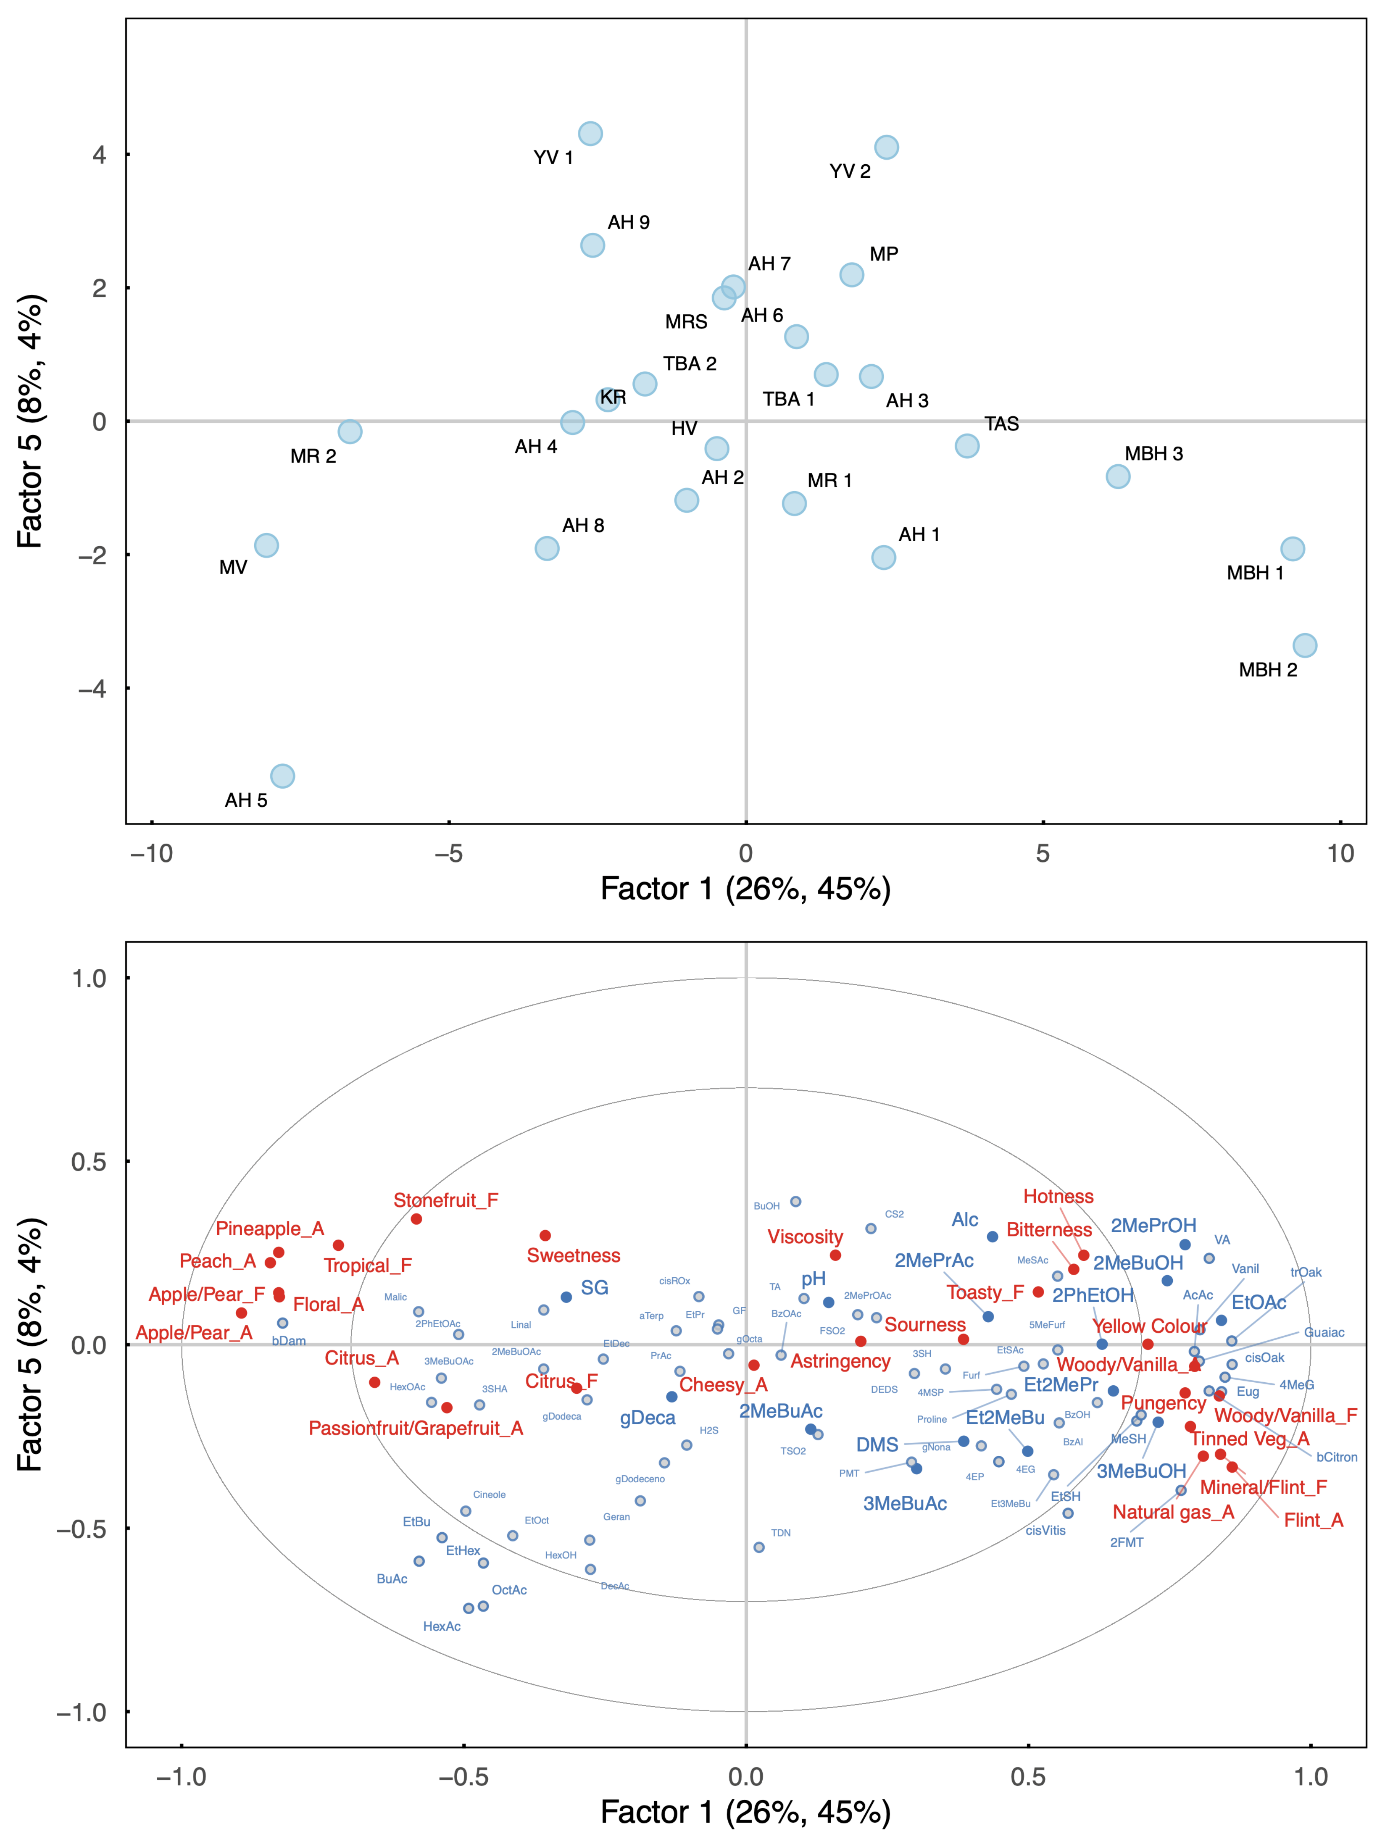


**Figure S1.** Factor 1 and 5 of scores and loadings plots from the PLS regression model. Plots were generated using sensory terms (*Y* variables) and compositional compounds (*X* variables) supported by statistical evidence (*P* < 0.05) to have differed among the wines.


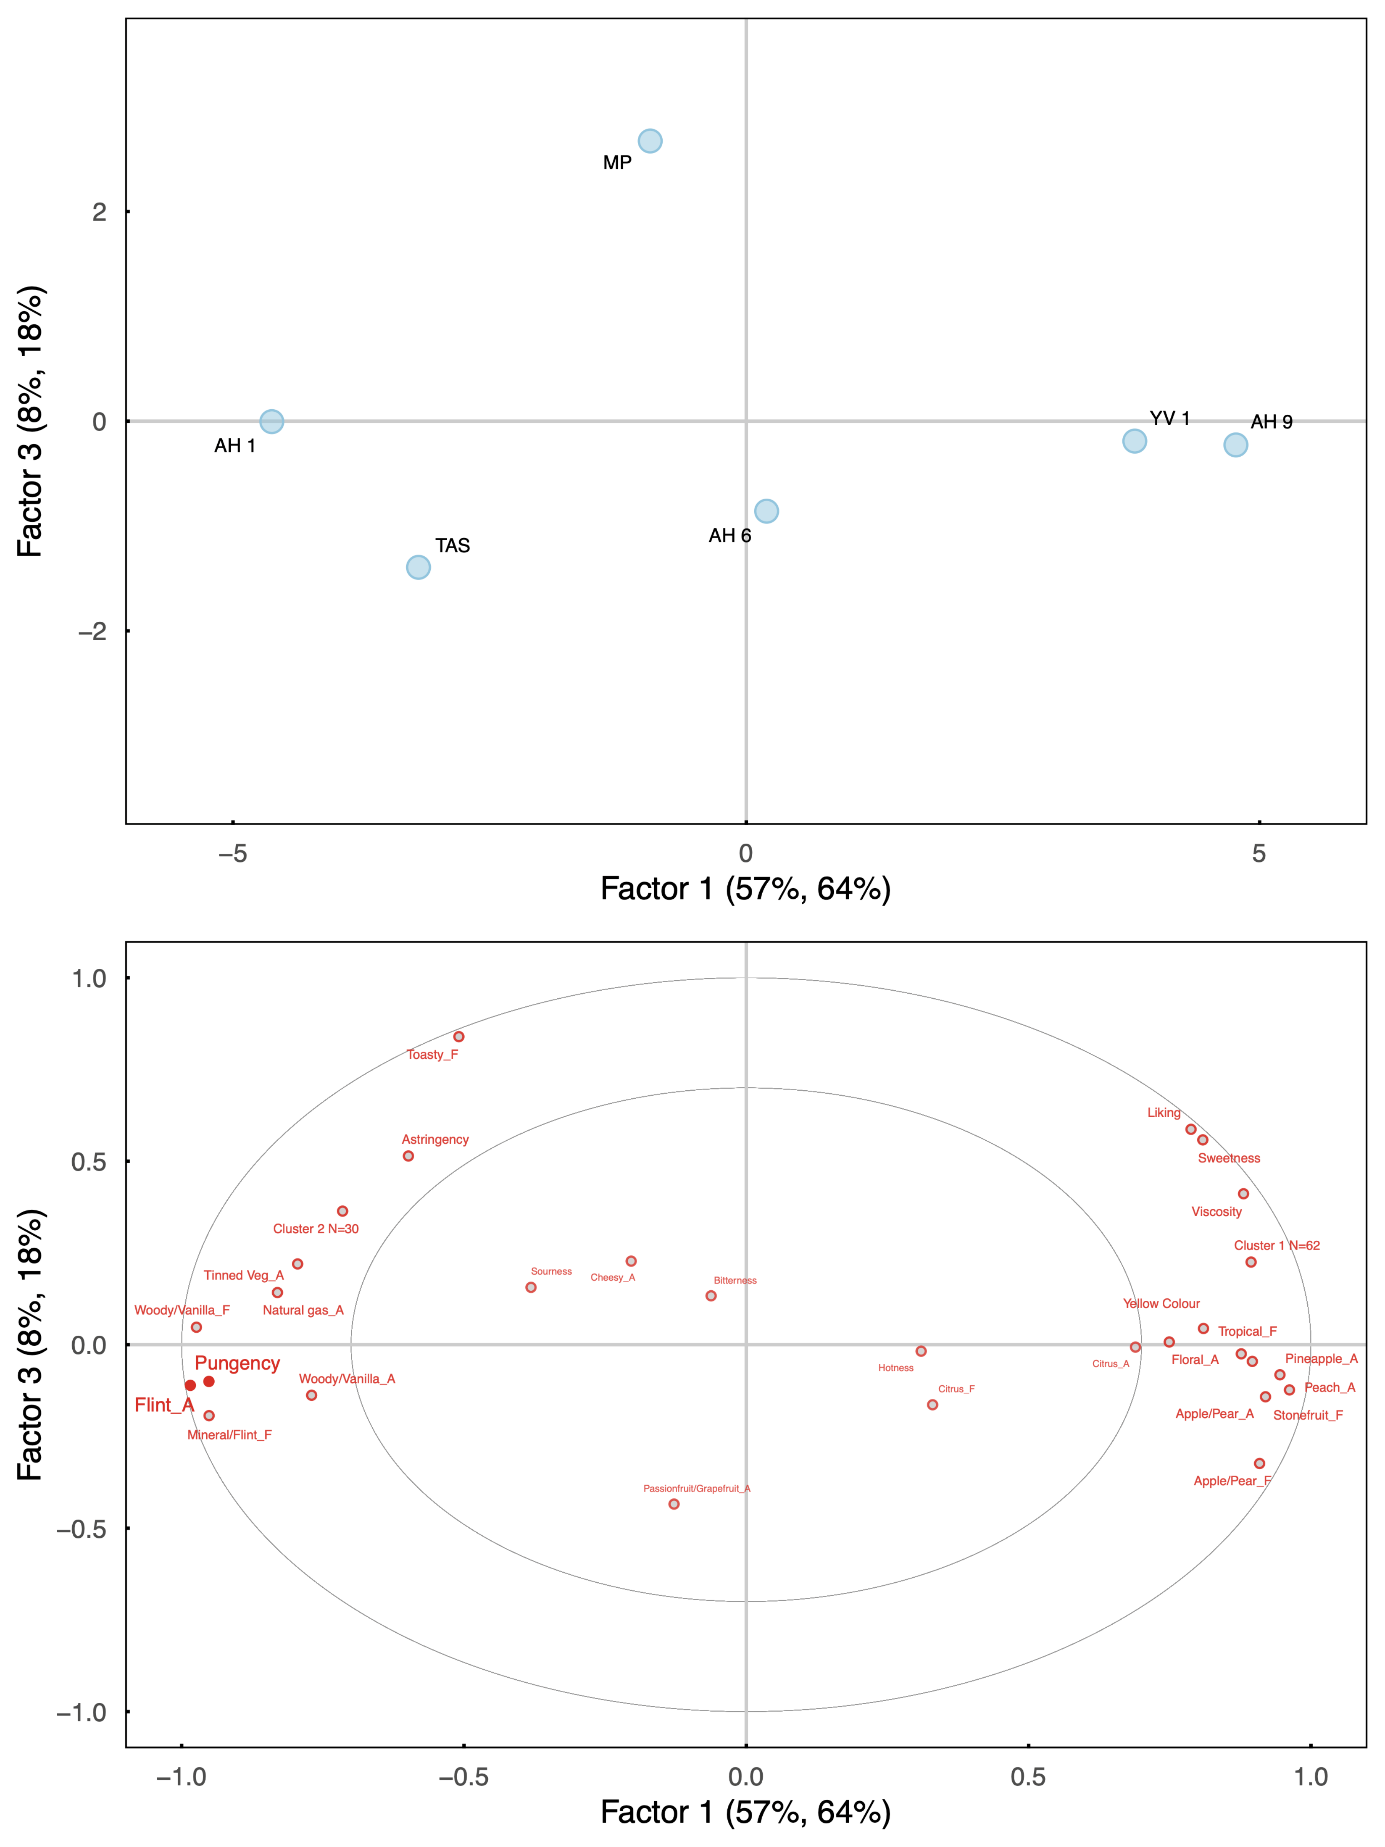


**Figure S2.** Factor 1 and 3 of scores and loadings plots from the PLS regression model. Plots were generated using consumer response (*Y* variables) and sensory attributes (*X* variables) supported by statistical evidence (*P* < 0.05) to have differed among the wines.
